# Supplementary material for: Drug Targeting the Actin Cytoskeleton Potentiates the Cytotoxicity of Low Dose Vincristine by Abrogating Actin-Mediated Repair of Spindle Defects
Source: Oxford University Press journal article supplement (doi:10.1158/1541-7786.mcr-19-1122), 2020-04-08
Supplement: 15417786mcr191122-sup-232713_2_supp_6197807_q81grb.docx [file 15417786mcr191122-sup-232713_2_supp_6197807_q81grb.docx]

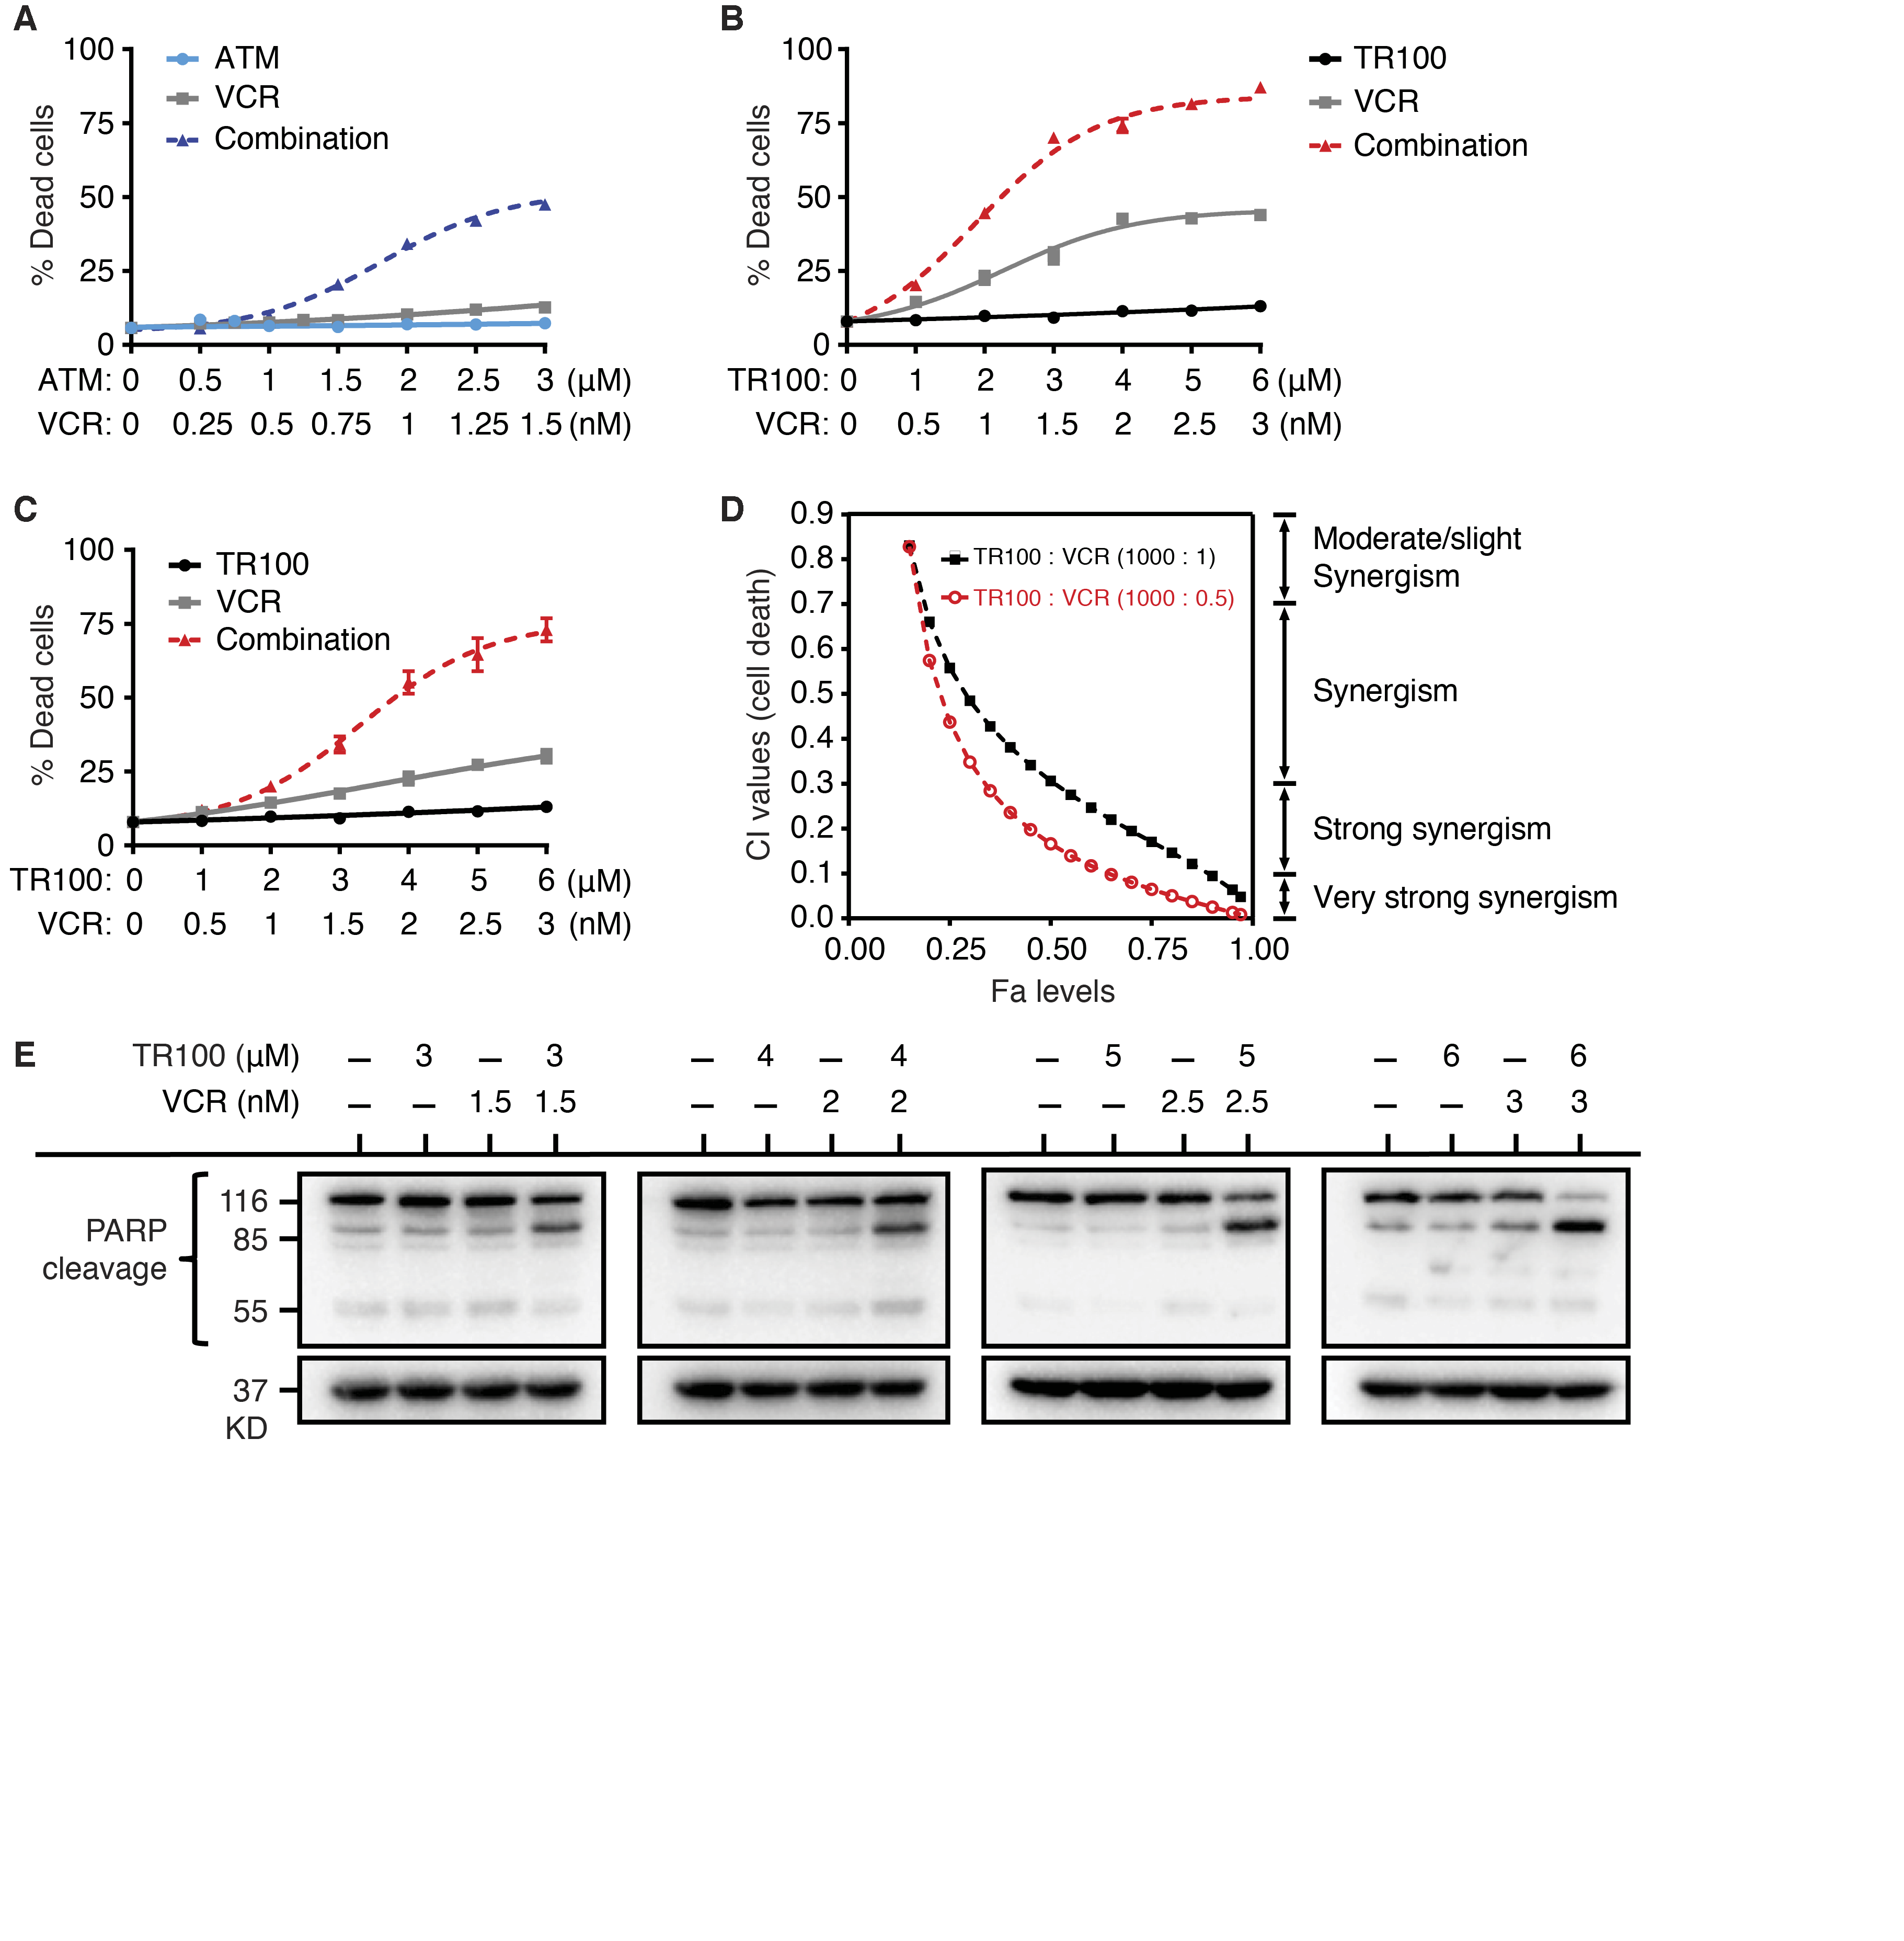


**Supplementary Figure S2.** The combinations of anti-Tpm3.1 drugs and VCR show strong synergy in inducing apoptosis. **A**, The combinational effect of ATM+VCR combination at dose ratio 1000:0.5 in causing cell death (early and late apoptosis/necrosis) was evaluated using the fixed-ratio isobologram method (24 h-treatments). **B** and **C**, The fixed-ratio isobologram curves of TR100+VCR combination at two dose ratios 1000:1 (**B**) and 1000:0.5 (**C**). **D**, CI values at different Fa levels were calculated to determine the synergy levels of TR100+VCR combinations at inducing cell death. CI values less than 0.9 demonstrate synergy. **E**, PARP cleavage pattern was detected by Western blot to determine the synergy of TR100+VCR in causing caspase-dependent apoptosis. Representative images were shown (*n* = 3 tests). Error bars represent ± SEM (*n* > 3 tests).
