# Supplementary material for: Drug Targeting the Actin Cytoskeleton Potentiates the Cytotoxicity of Low Dose Vincristine by Abrogating Actin-Mediated Repair of Spindle Defects
Source: Oxford University Press journal article supplement (doi:10.1158/1541-7786.mcr-19-1122), 2020-04-08
Supplement: 15417786mcr191122-sup-232713_2_supp_6197808_q81grb.docx [file 15417786mcr191122-sup-232713_2_supp_6197808_q81grb.docx]

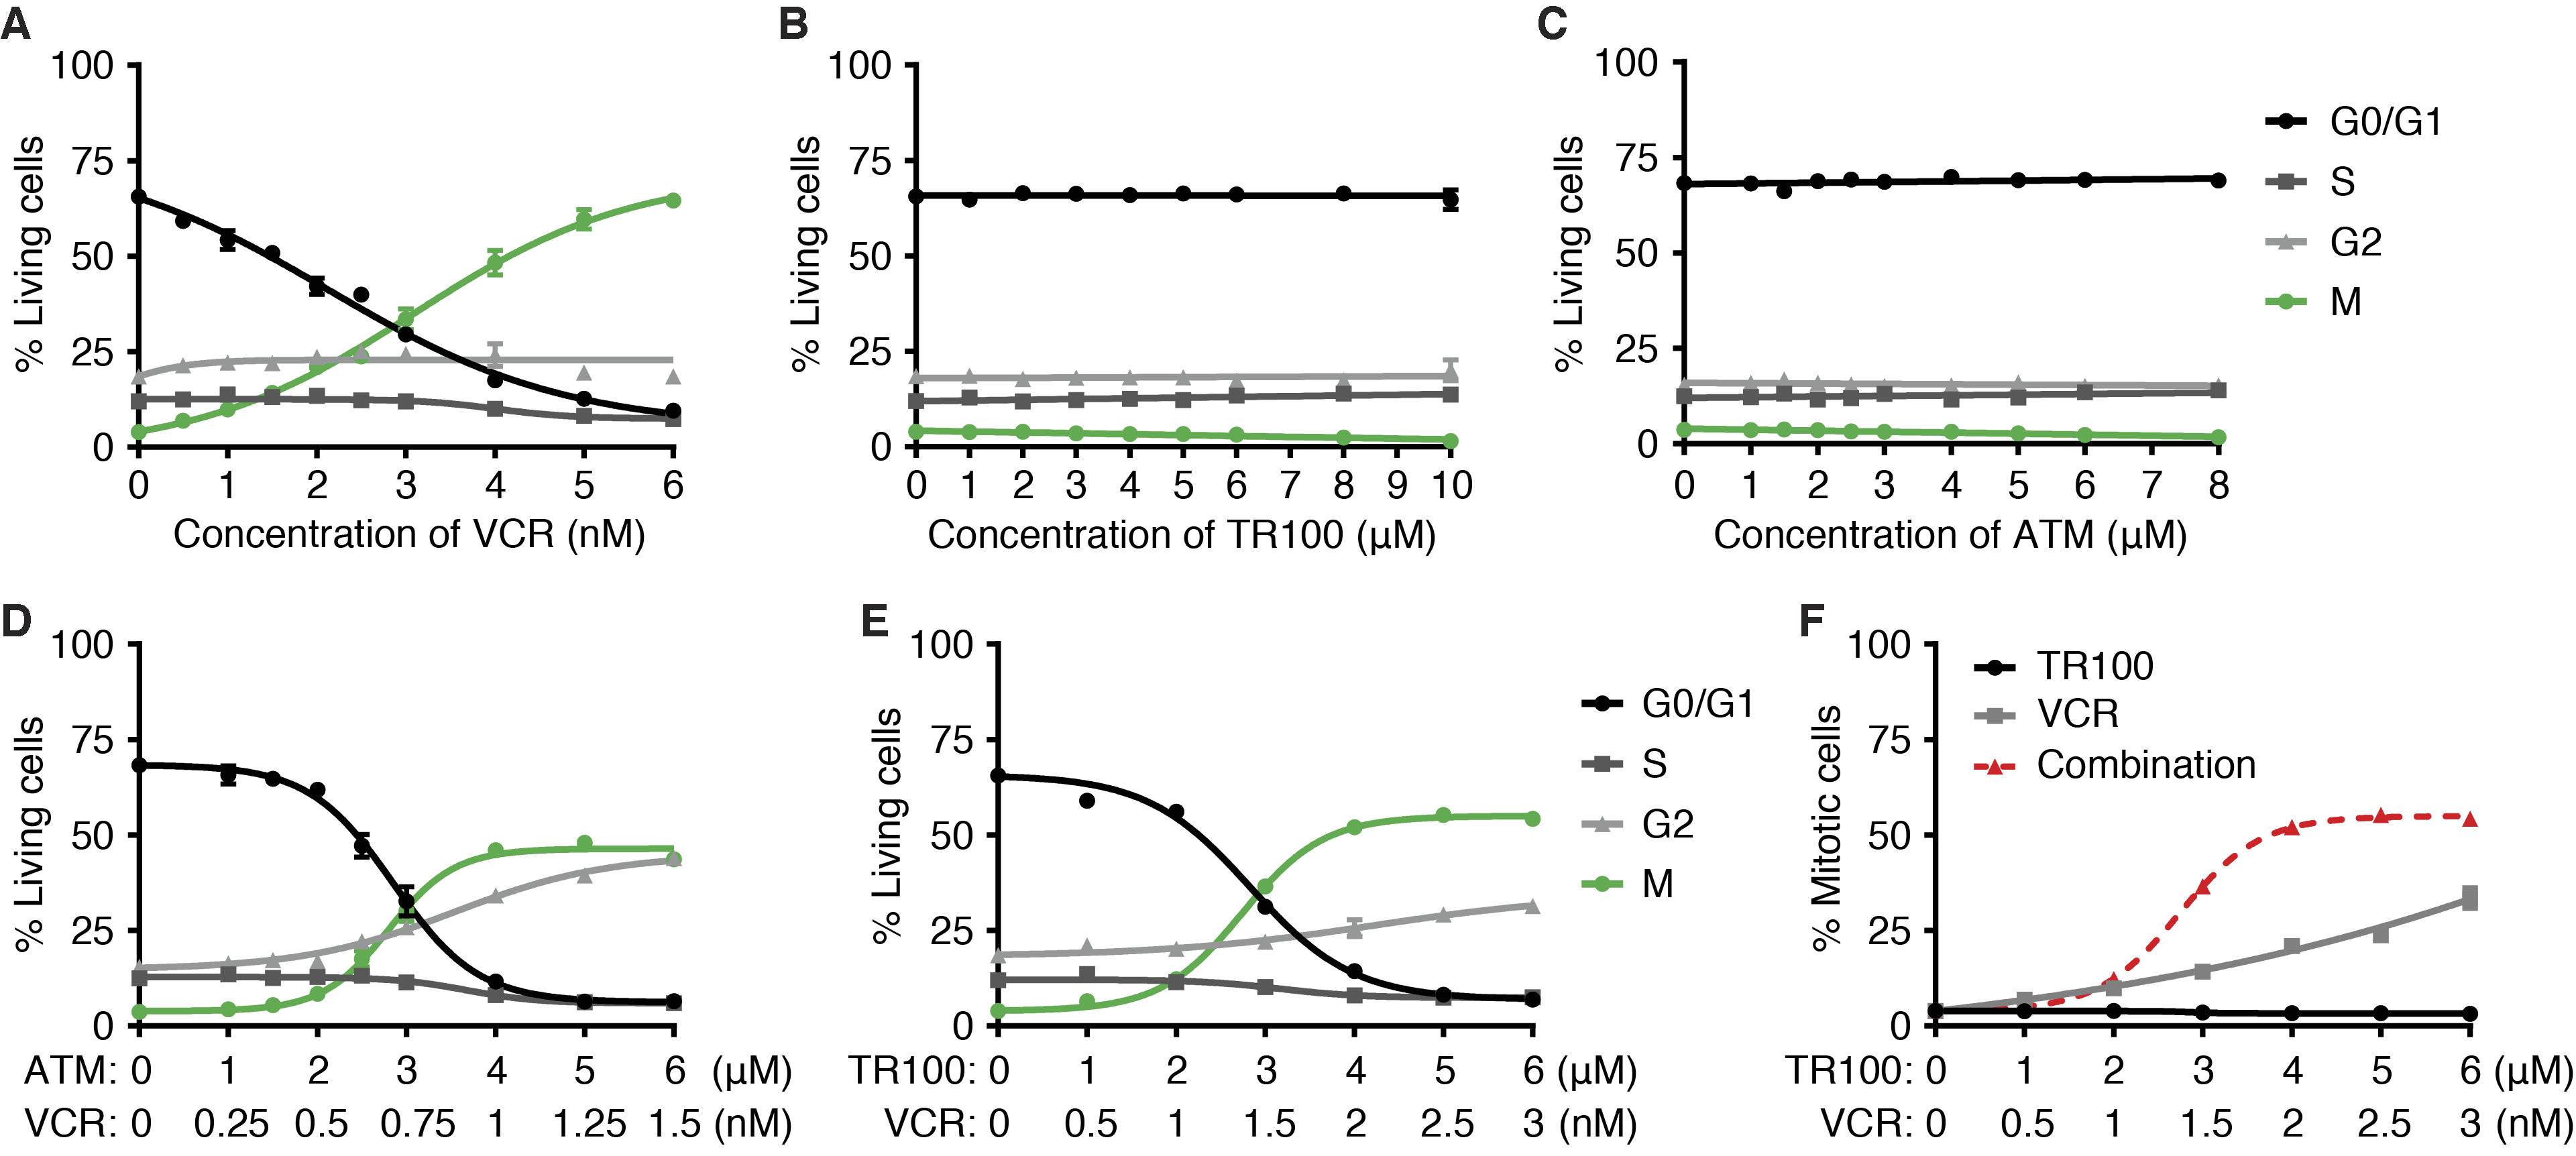


**Supplementary Figure S3.** The combinations of anti-Tpm3.1 compounds and VCR synergistically arrest HeLa cells in mitosis. **A**–**C**, The impacts of VCR (**A**), TR100 (**B**) and ATM (**C**) on cell cycle distribution (24 h-treatments). **D** and **E**, The combinational impacts of ATM+VCR at 1000:0.25 dose ratio (**D**) and TR100+VCR at 1000:0.5 dose ratio (**E**) on cell cycle distribution (24 h-treatments). **F**, The addition of TR100 strongly promoted the VCR-induced mitotic arrest (24 h-treatments). Error bars represent ± SEM (*n* > 3 tests).
