# Supplementary material for: Drug Targeting the Actin Cytoskeleton Potentiates the Cytotoxicity of Low Dose Vincristine by Abrogating Actin-Mediated Repair of Spindle Defects
Source: Oxford University Press journal article supplement (doi:10.1158/1541-7786.mcr-19-1122), 2020-04-08
Supplement: 15417786mcr191122-sup-232713_2_supp_6197809_q81grb.docx [file 15417786mcr191122-sup-232713_2_supp_6197809_q81grb.docx]

**
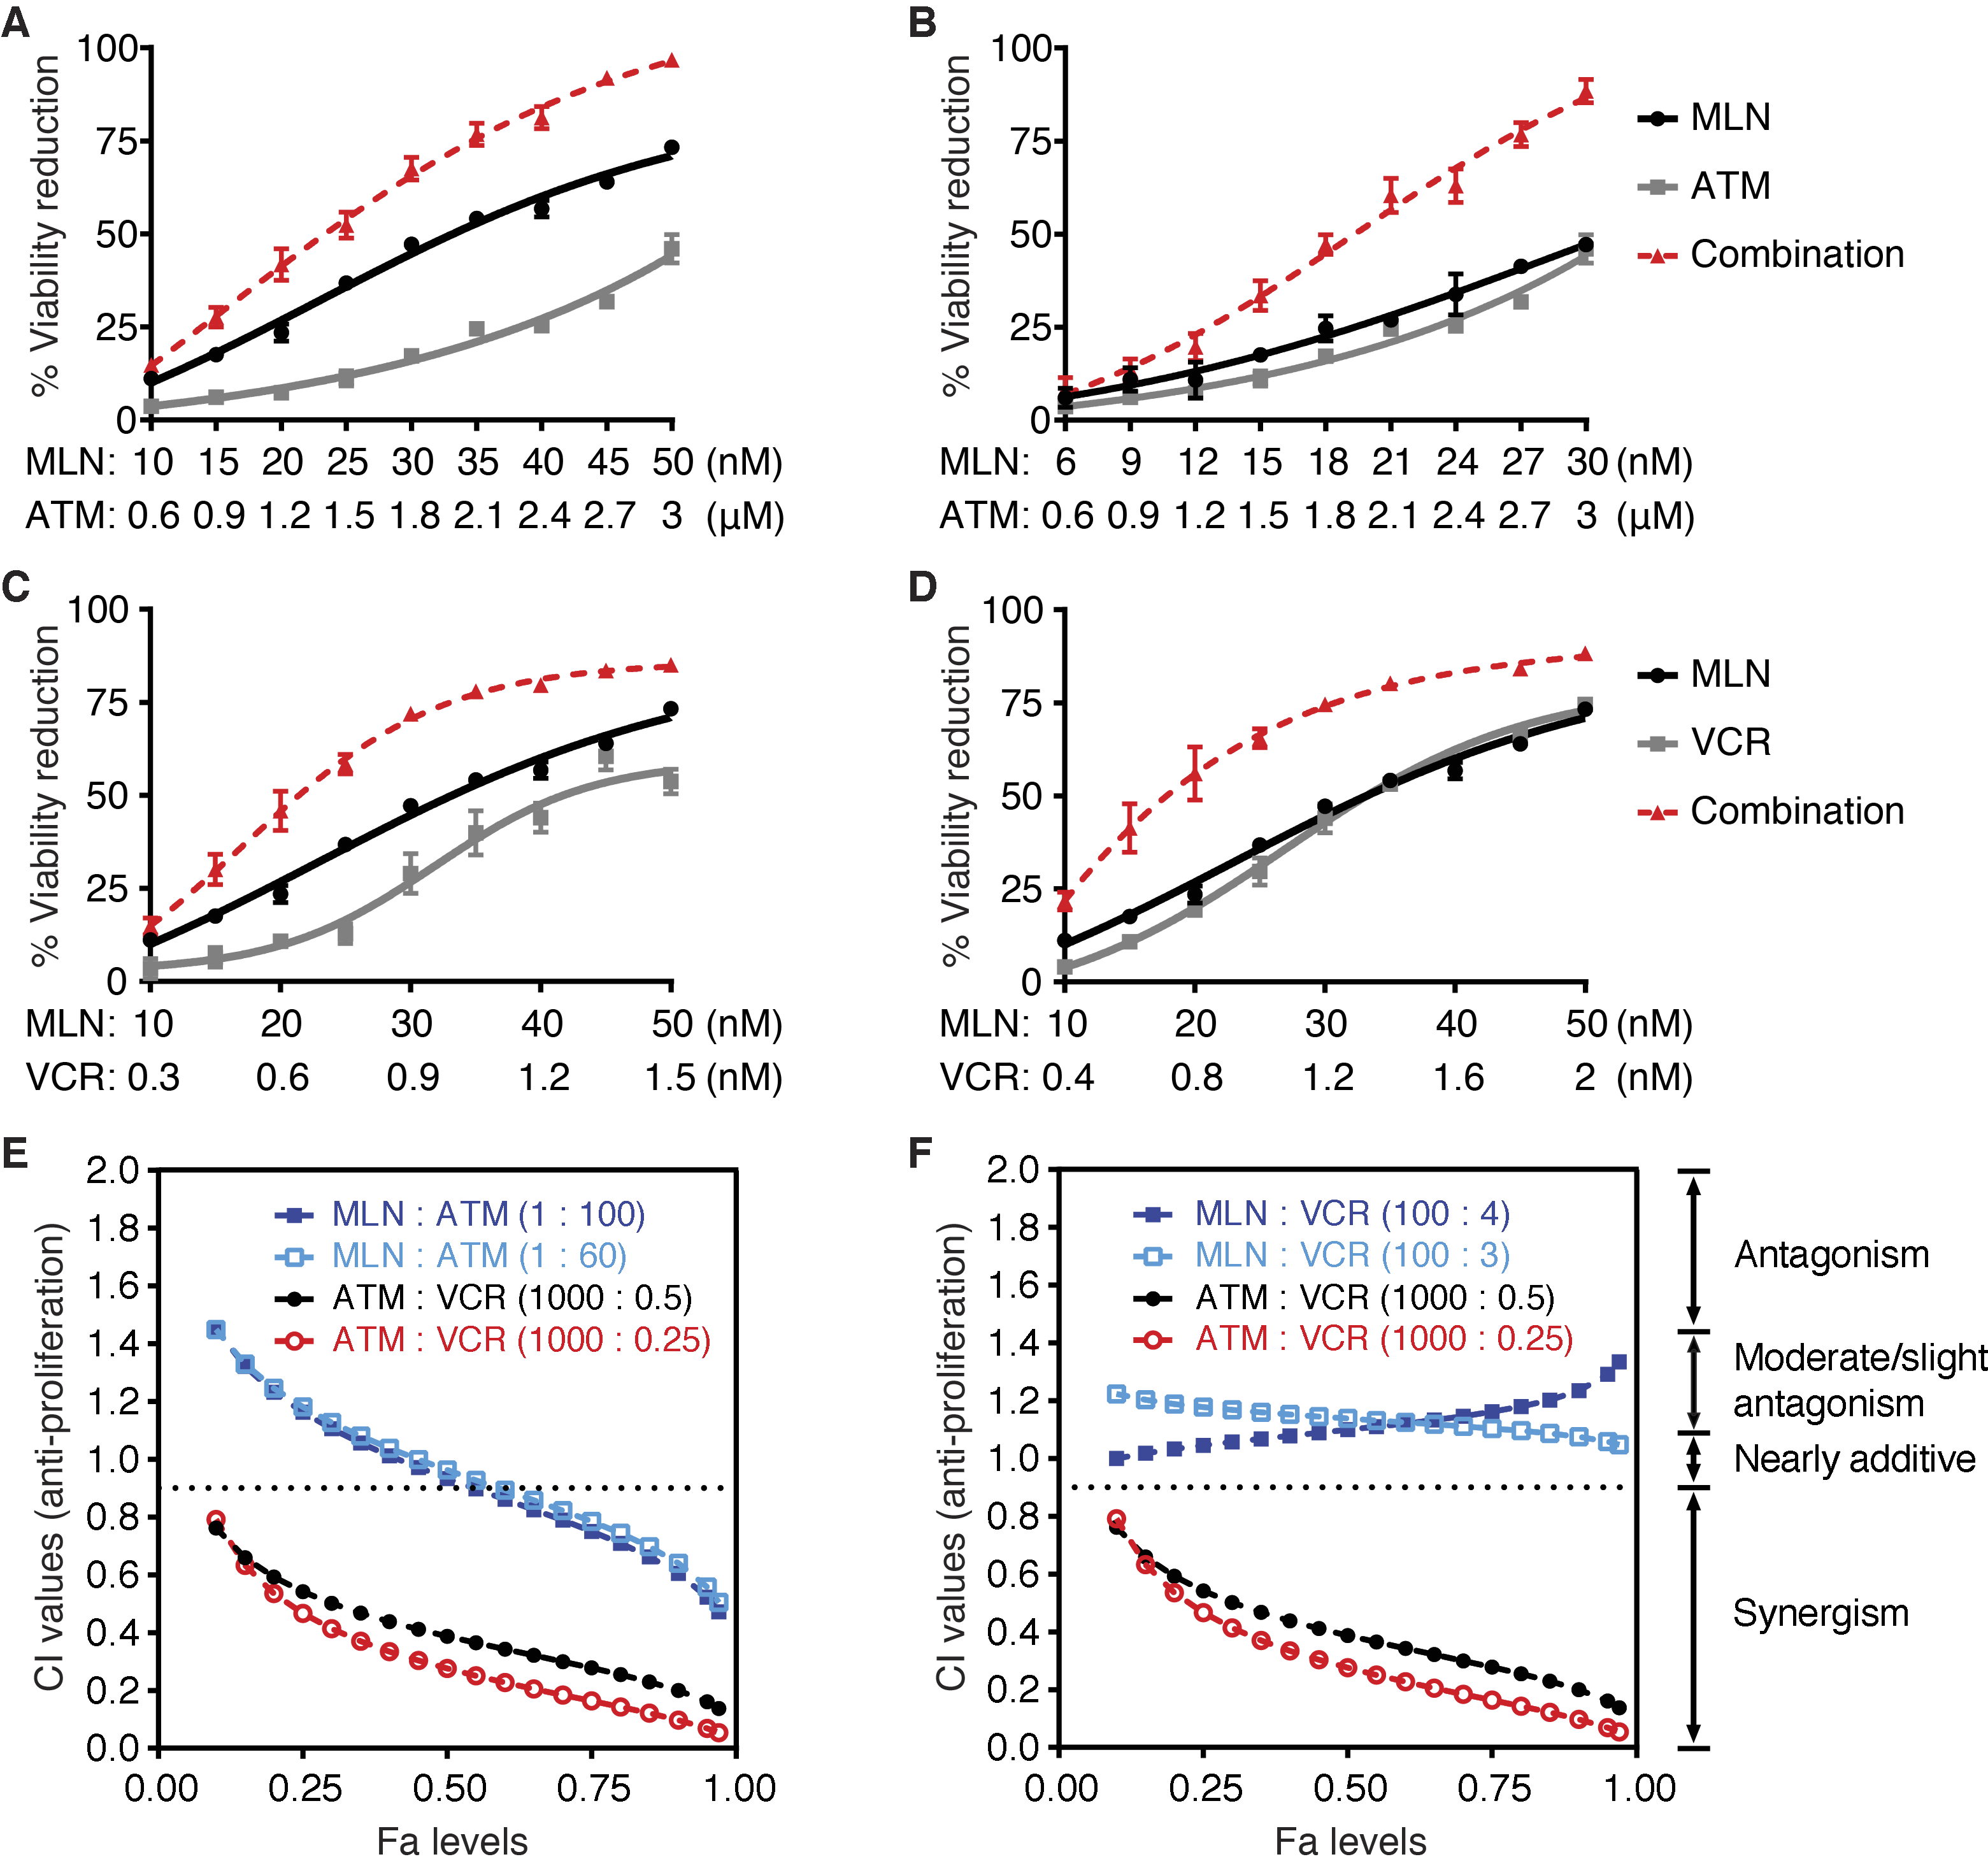
**

**Supplementary Figure S4.** Aurora-A inhibitor MLN8237 (MLN) shows no or low synergy with VCR or ATM. **A**–**D**, Fixed-ratio isobologram analysis was performed to quantitate the synergy levels of MLN+ATM combination at 1:60 (**A**) and 1:100 (**B**) dose ratios, and MLN+VCR combination at 100:3 (**C**) and 100:4 (**D**) dose ratios in reducing HeLa cell viability (72 h-treatments); error bars represent ± SEM (*n* > 3 tests). **E** and **F**, CI values at different Fa levels were calculated to determine the synergy levels of MLN+ATM (**E**) and MLN+VCR (**F**) combinations. The corresponding values for the ATM+VCR combination are shown for comparison.
