# Supplementary material for: Drug Targeting the Actin Cytoskeleton Potentiates the Cytotoxicity of Low Dose Vincristine by Abrogating Actin-Mediated Repair of Spindle Defects
Source: Oxford University Press journal article supplement (doi:10.1158/1541-7786.mcr-19-1122), 2020-04-08
Supplement: 15417786mcr191122-sup-232713_2_supp_6197812_q81grc.docx [file 15417786mcr191122-sup-232713_2_supp_6197812_q81grc.docx]

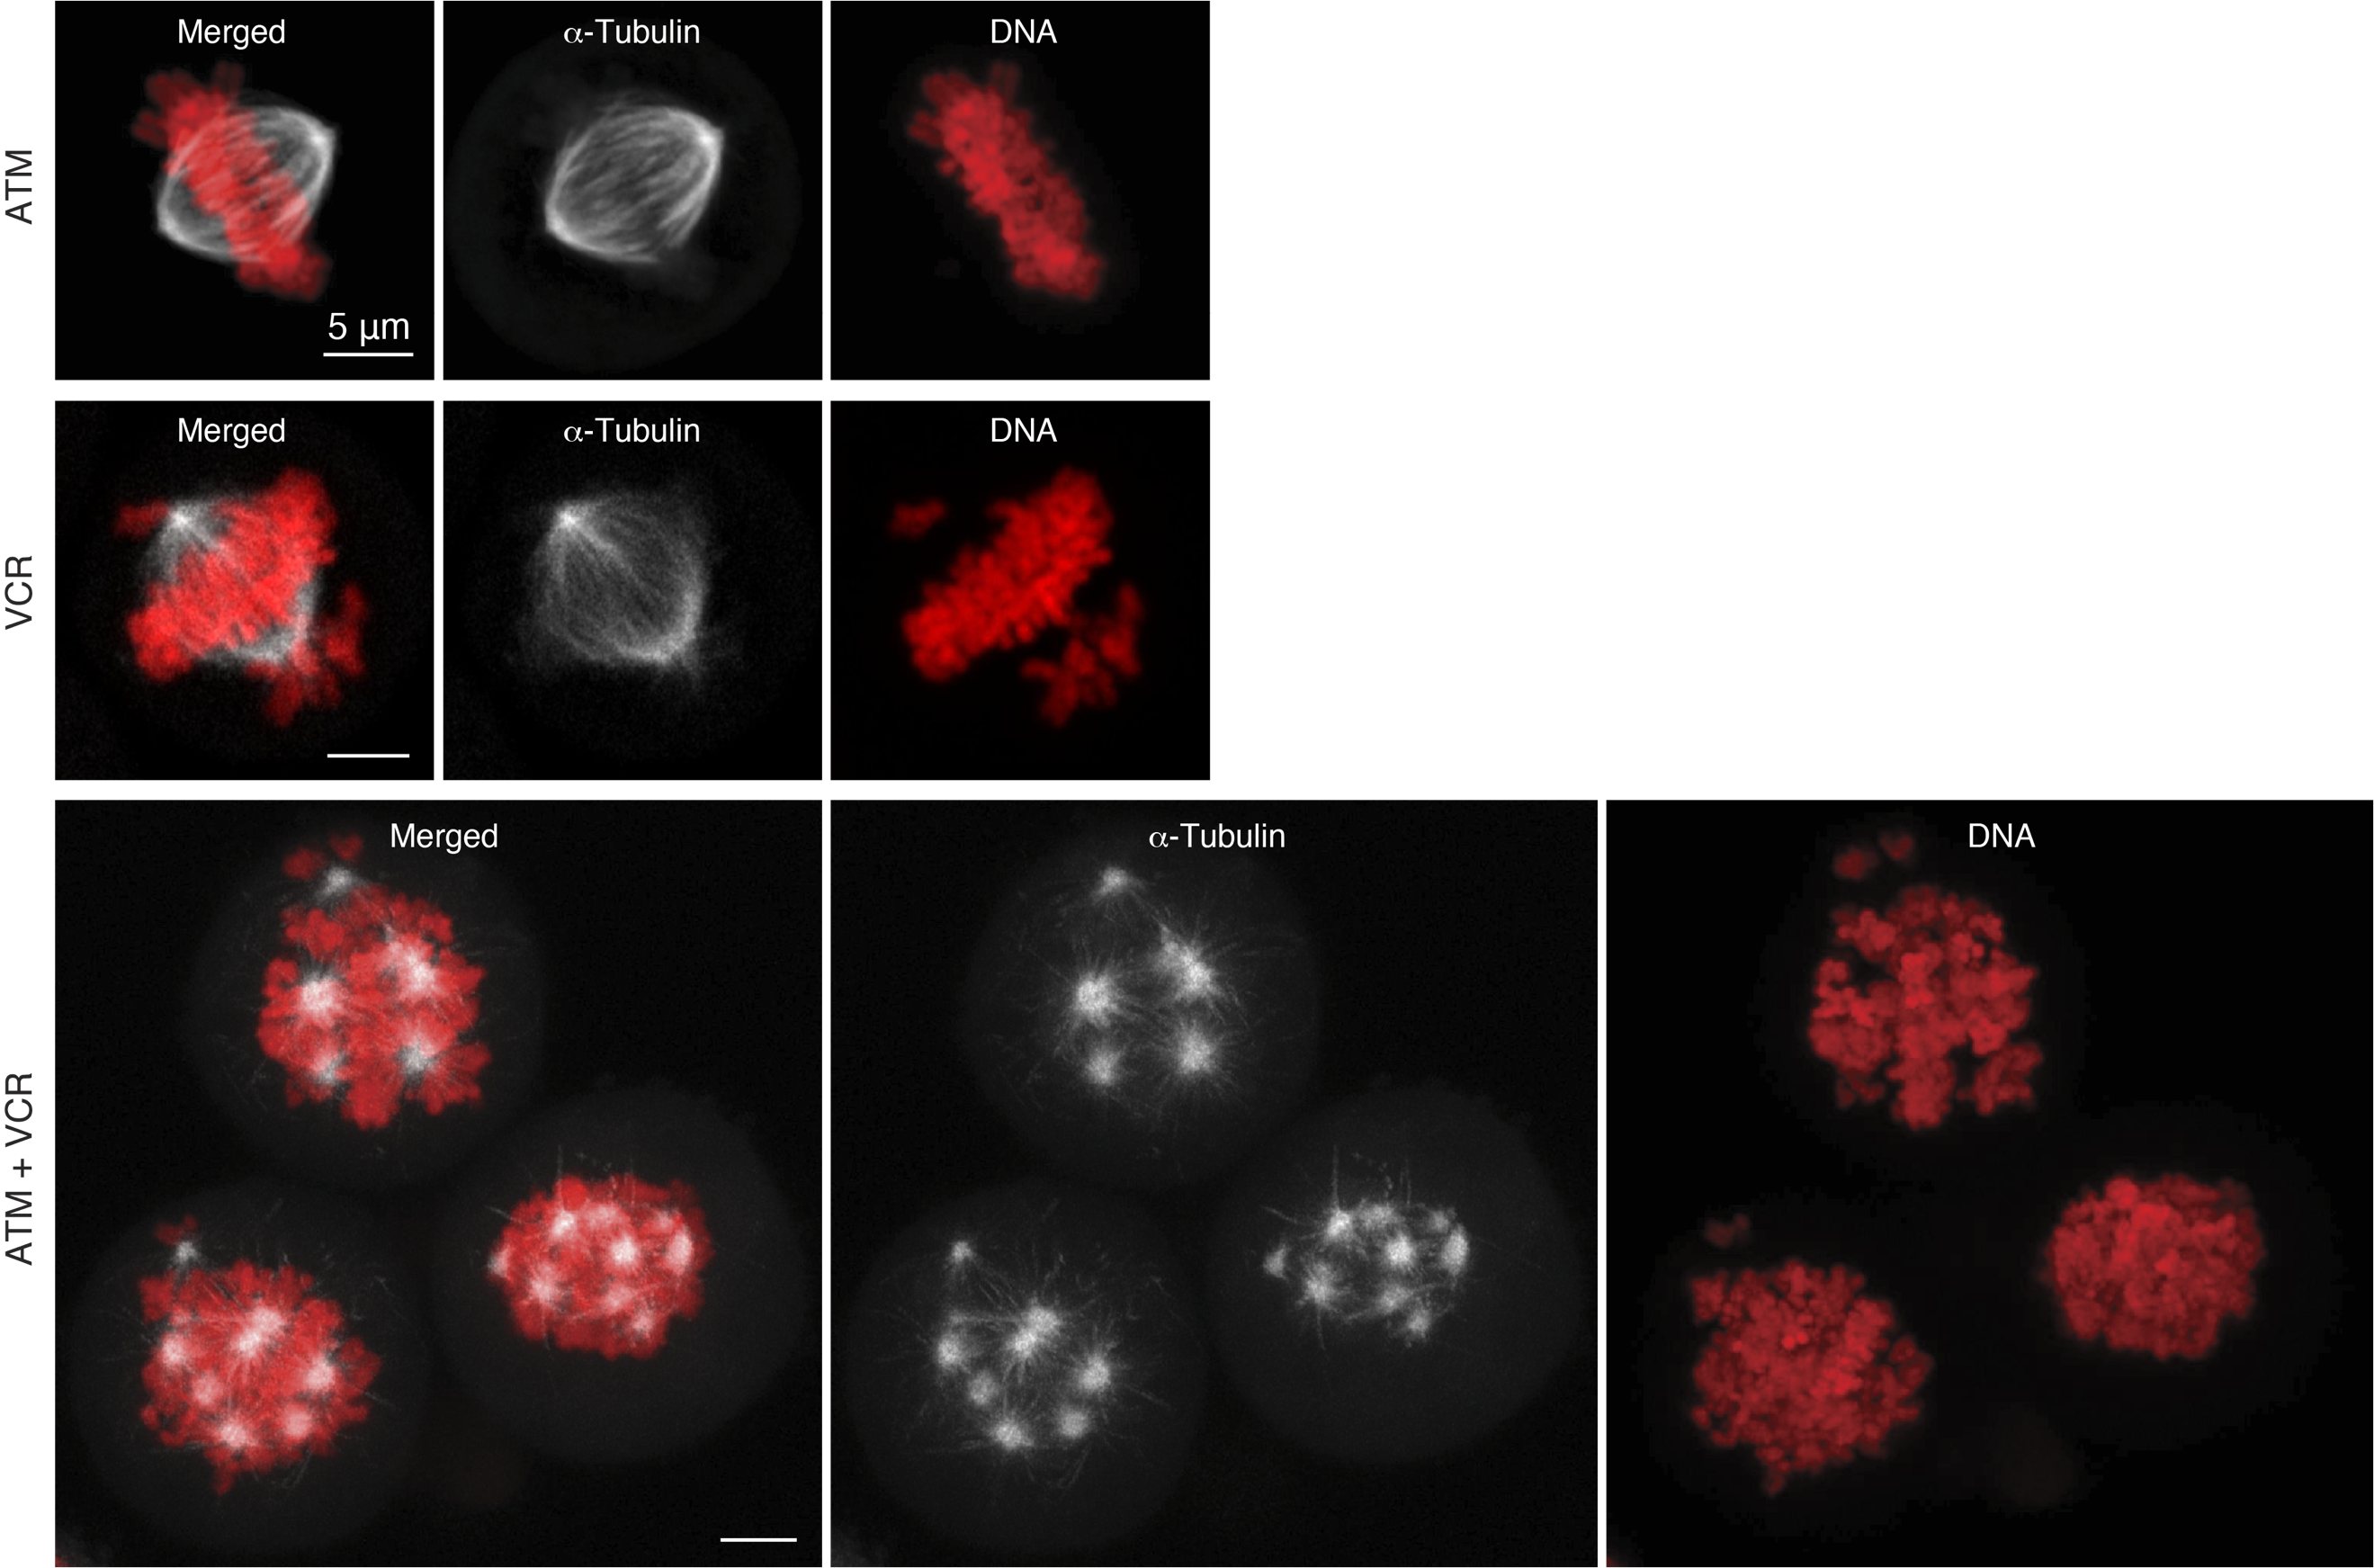


**Supplementary Figure S7.** Representative images of spindle phenotypes. The mitotic spindle phenotypes in cells treated with ATM 3 mM, VCR 1.5 nM or their combination (24 h-treatments) were visualized via live-cell imaging using HeLa cells expressing -tubulin-GFP (white) and H2B-mCherry (red). Scale bar = 5 m.
